# Supplementary material
Source: PubMed Central journal article supplement (PMC6643250)

## **Supplementary Materials**

**Supplementary Table 1.** Barcode sequences.

**Supplementary Table 2.** Sequencing information for the samples.

**Supplementary Table 3.** Spearman's correlation between microbial  $\alpha$ -diversity indices and environmental factors.

**Supplementary Table 4.** Significance test of the similarity between the phycosphere microbial communities and null model simulations at different stages, and  $\beta$ NTI and RCBray values based on Weighted Bray–Curtis distances.

**Supplementary Figure 1.** Samples collected according to the HAB phases, including pre-, during- and post-bloom stages (the red cycle).

**Supplementary Figure 2.** Morphology of *S. trochoidea* under a light microscope. Scale bar is 20  $\mu$ m.

**Supplementary Figure 3.** Venn diagram showing the overlap of OTUs between sample types.

**Supplementary Figure 4.** LEfSe diagram showing the difference of OTUs among the different bloom stages.

**Supplementary Figure 5.** Relative abundance of bacteria at phylum level.

**Supplementary Figure 6.** Heat-map of microbial communities at family (A) and genus (B) levels. AT, attached bacteria; FL, free-living bacteria.

**Supplementary Figure 7.** (A) Bray-Curtis similarity-based dendrogram at the OTU level illustrating groups in samples. (B) Correspondence canonical analysis (CCA) based on microbial communities (OTUs) and environmental parameters sampled during the bloom.

**Supplementary Figure 8.** Correlation analysis between relative abundances of the 100 most abundant bacterial OTUs and environmental variables based on Pearson correlations. Correlation values depict r-values of Pearson correlations. Statistical significance: +,  $P < 0.05$ ; \*,  $P < 0.01$ .

**Supplemental Table 1:** Barcode sequences.

| Sample names | Barcode sequences |
|--------------|-------------------|
| Pre-A-1      | CACGCTGT          |
| Pre-A-2      | CGCATGAA          |
| Pre-A-3      | TATCGCAA          |
| Pre-A-4      | AGTGCTTA          |
| Pre-A-5      | AGTGTGAA          |
| Pre-A-6      | CAGTATTA          |
| Pre-A-7      | TGCACATT          |
| Pre-A-8      | AGGCCAGT          |
| Pre-A-9      | TTCGACTA          |
| Pre-A-10     | AGTGACGA          |
| Pre-A-11     | TGCATACA          |
| Pre-A-12     | AGTCGAAC          |
| Pre-FL-1     | ACCAGTGA          |
| Pre-FL-2     | GAATACCA          |
| Pre-FL-3     | GTAGATCG          |
| Pre-FL-4     | TAACGTGT          |
| Pre-FL-5     | CATTATGG          |
| Pre-FL-6     | CCAATACG          |
| Pre-FL-7     | GATCTGCG          |
| Pre-FL-8     | GCAACACC          |
| Pre-FL-9     | GCGATATA          |
| Pre-FL-10    | CGAGCAAT          |
| Pre-FL-11    | CGAGGGAA          |
| Pre-FL-12    | CAAATTCG          |
| During-A-1   | TCGACATC          |
| During-A-2   | TTGGCTCT          |
| During-A-3   | GATCCAC           |
| During-A-4   | TACCGCTT          |
| During-A-5   | TGTGCGAT          |
| During-A-6   | GATTATCG          |
| During-A-7   | GCCTAGCC          |
| During-A-8   | ACTCCTTG          |
| During-A-9   | GTCACGGA          |
| During-A-10  | GCGAGCGA          |
| During-A-11  | TCTTGGAG          |
| During-A-12  | TCACCTCC          |
| During-FL-1  | GCACACCT          |
| During-FL-2  | GCGACAAT          |
| During-FL-3  | TCATGCTC          |
| During-FL-4  | AGCTGTCA          |

| Sample names | Barcode sequences |
|--------------|-------------------|
| During-FL-5  | GAGAGCAA          |
| During-FL-6  | TACTCGGG          |
| During-FL-7  | CGTGCTTA          |
| During-FL-8  | GTATTTCG          |
| During-FL-9  | TATCTATC          |
| During-FL-10 | TTGCCAAG          |
| During-FL-11 | AGTAGCGG          |
| During-FL-12 | GCAATTAG          |
| After-A-1    | CATACCGT          |
| After-A-2    | CCTGCGAA          |
| After-A-3    | TTCTCTCG          |
| After-A-4    | GCTCTCCG          |
| After-A-5    | TGCATACA          |
| After-A-6    | AGTCGAAC          |
| After-A-7    | ACCAGTGA          |
| After-A-8    | GAATACCA          |
| After-A-9    | GTAGATCG          |
| After-A-10   | TAACGTGT          |
| After-A-11   | CATTATGG          |
| After-A-12   | CCAATACG          |
| After-FL-1   | GATCTGCG          |
| After-FL-2   | GCAACACC          |
| After-FL-3   | GCGATATA          |
| After-FL-4   | CGAGCAAT          |
| After-FL-5   | CGAGGGAA          |
| After-FL-6   | CAAATTCG          |
| After-FL-7   | AGTTGAGG          |
| After-FL-8   | ACAATAGA          |
| After-FL-9   | AGTTACGA          |
| After-FL-10  | GCATATGC          |
| After-FL-11  | AGTCGTGC          |
| After-FL-12  | GTATCTGC          |

**Table 2.** Sequencing information for the samples.

| Sample ID | Raw Reads<br>(PE) | Clean Reads<br>(PE) | Raw Tags | Clean Tags | MaxLen<br>(nt) | MinLen<br>(nt) | AvgLen<br>(nt) | GC<br>(%) | No. of seqs | No. of OTUs | Effective/<br>Coverage (%) |
|-----------|-------------------|---------------------|----------|------------|----------------|----------------|----------------|-----------|-------------|-------------|----------------------------|
| Pre.A.1   | 152066            | 144928              | 143909   | 97157      | 398            | 366            | 372.07         | 51.96     | 66801       | 1143        | 82.68 (95.32)              |
| Pre.A.2   | 170871            | 163210              | 161740   | 151635     | 389            | 362            | 372.28         | 51.28     | 101078      | 1765        | 82.04 (97.13)              |
| Pre.A.3   | 145990            | 139070              | 137949   | 118365     | 391            | 368            | 372.3          | 50.38     | 74461       | 1382        | 80.86 (97.66)              |
| Pre.A.4   | 152282            | 145813              | 144535   | 101977     | 401            | 364            | 372.4          | 50.8      | 62864       | 1381        | 86.09 (95.43)              |
| Pre.A.5   | 151895            | 144696              | 143381   | 99502      | 391            | 361            | 372.39         | 50.63     | 62101       | 1348        | 86.28 (96.89)              |
| Pre.A.6   | 138048            | 132162              | 131156   | 113066     | 396            | 363            | 372.36         | 50.03     | 67335       | 1247        | 80.82 (96.93)              |
| Pre.A.7   | 192582            | 184280              | 182739   | 174199     | 391            | 364            | 372.14         | 51.29     | 124666      | 1583        | 87.05 (97.04)              |
| Pre.A.8   | 187035            | 178323              | 176626   | 163391     | 385            | 366            | 372.39         | 51.25     | 107997      | 2108        | 82.43 (96.12)              |
| Pre.A.9   | 140224            | 134044              | 133132   | 85809      | 386            | 364            | 372.06         | 51.94     | 59237       | 1068        | 83.06 (96.22)              |
| Pre.A.10  | 131911            | 125398              | 123879   | 113403     | 395            | 364            | 372.37         | 50.62     | 71485       | 1687        | 81.34 (96.99)              |
| Pre.A.11  | 140913            | 134460              | 133440   | 126664     | 399            | 363            | 371.94         | 51.7      | 91990       | 1338        | 87.50 (97.11)              |
| Pre.A.12  | 144024            | 137809              | 136716   | 117166     | 386            | 368            | 372.3          | 50.05     | 75518       | 1332        | 83.99 (96.88)              |
| Pre.FL.1  | 194629            | 184610              | 182811   | 143433     | 397            | 361            | 372.05         | 52.36     | 84065       | 1563        | 93.33 (98.34)              |
| Pre.FL.2  | 143542            | 136586              | 135270   | 120701     | 389            | 361            | 372.12         | 52.71     | 77310       | 1261        | 92.31 (98.21)              |
| Pre.FL.3  | 152514            | 146049              | 144532   | 103571     | 397            | 363            | 372.38         | 51.2      | 67107       | 2522        | 86.95 (97.75)              |
| Pre.FL.4  | 161819            | 154679              | 153212   | 117515     | 397            | 362            | 372.48         | 51.28     | 72759       | 2911        | 88.12 (97.78)              |
| Pre.FL.5  | 150890            | 144395              | 142826   | 101771     | 402            | 363            | 372.53         | 50.87     | 63039       | 2709        | 89.40 (97.86)              |
| Pre.FL.6  | 186933            | 177370              | 174290   | 126203     | 413            | 363            | 372.64         | 50.28     | 65688       | 2440        | 84.94 (98.02)              |
| Pre.FL.7  | 157382            | 148915              | 147585   | 113735     | 395            | 361            | 372            | 52.48     | 65491       | 1309        | 89.66 (98.01)              |
| Pre.FL.8  | 180833            | 172818              | 170872   | 115077     | 406            | 364            | 372.48         | 50.66     | 67014       | 2786        | 84.01 (96.47)              |
| Pre.FL.9  | 148122            | 140331              | 138923   | 113474     | 398            | 365            | 372.09         | 52.42     | 65186       | 1369        | 94.85 (96.52)              |
| Pre.FL.10 | 163449            | 155874              | 154120   | 119329     | 408            | 363            | 372.6          | 50.83     | 67290       | 2942        | 85.07 (97.77)              |
| Pre.FL.11 | 176245            | 167402              | 164520   | 127302     | 393            | 361            | 372.74         | 50.22     | 59407       | 2539        | 79.85 (98.18)              |
| Pre.FL.12 | 167155            | 159692              | 157036   | 123864     | 401            | 361            | 372.65         | 50.83     | 66715       | 3253        | 82.49 (97.99)              |

|              |        |        |        |        |     |     |        |       |        |      |               |
|--------------|--------|--------|--------|--------|-----|-----|--------|-------|--------|------|---------------|
| During.A.1   | 177538 | 169853 | 168016 | 138870 | 395 | 363 | 372.59 | 50.45 | 78099  | 1628 | 85.15 (96.77) |
| During.A.2   | 158268 | 151254 | 149650 | 119621 | 401 | 365 | 372.29 | 50.5  | 77802  | 1371 | 85.94 (96.45) |
| During.A.3   | 122271 | 116659 | 115188 | 94631  | 390 | 366 | 372.42 | 50.4  | 57399  | 1253 | 98.21 (96.65) |
| During.A.4   | 112874 | 107554 | 106361 | 83356  | 407 | 364 | 372.32 | 50.78 | 52907  | 1219 | 84.49 (97.31) |
| During.A.5   | 158313 | 150955 | 149268 | 120125 | 400 | 364 | 372.36 | 50.71 | 74574  | 1526 | 84.08 (96.32) |
| During.A.6   | 144230 | 138234 | 137313 | 91833  | 393 | 359 | 372.11 | 52.15 | 61000  | 1138 | 80.72 (96.32) |
| During.A.7   | 140347 | 133610 | 132630 | 84129  | 382 | 362 | 372.07 | 52.03 | 58202  | 1039 | 83.24 (97.59) |
| During.A.8   | 137902 | 130941 | 129108 | 105337 | 401 | 366 | 372.41 | 50.45 | 63160  | 1403 | 81.94 (96.92) |
| During.A.9   | 149205 | 142580 | 141124 | 109001 | 405 | 364 | 372.66 | 50.48 | 60969  | 1422 | 88.78 (96.75) |
| During.A.10  | 153063 | 145265 | 143685 | 115261 | 407 | 361 | 372.52 | 50.34 | 64251  | 1406 | 85.27 (96.66) |
| During.A.11  | 206123 | 196752 | 194569 | 152827 | 403 | 362 | 372.56 | 50.59 | 90003  | 1764 | 87.02 (96.94) |
| During.A.12  | 169853 | 162627 | 161253 | 128968 | 397 | 367 | 372.33 | 51.19 | 85695  | 1657 | 85.68 (96.87) |
| During.FL.1  | 154053 | 147251 | 146282 | 132205 | 382 | 366 | 371.92 | 53.27 | 112851 | 764  | 96.25 (97.03) |
| During.FL.2  | 142735 | 135230 | 132840 | 117182 | 397 | 361 | 372.67 | 51.75 | 60353  | 2518 | 95.47 (97.55) |
| During.FL.3  | 138501 | 130801 | 128129 | 109921 | 401 | 359 | 372.66 | 51.93 | 67917  | 2456 | 84.26 (97.82) |
| During.FL.4  | 161740 | 154550 | 153456 | 118784 | 385 | 367 | 372.12 | 52.12 | 71552  | 1414 | 86.53 (96.86) |
| During.FL.5  | 149047 | 140964 | 137749 | 117919 | 406 | 361 | 372.58 | 51.97 | 66946  | 2074 | 84.22 (97.37) |
| During.FL.6  | 170248 | 161819 | 159427 | 138826 | 409 | 361 | 372.27 | 51.52 | 88400  | 2521 | 83.65 (97.85) |
| During.FL.7  | 150389 | 143170 | 142075 | 105216 | 390 | 359 | 371.99 | 52.18 | 60753  | 1388 | 89.65 (97.32) |
| During.FL.8  | 160623 | 151460 | 149125 | 126418 | 403 | 361 | 372.39 | 51.25 | 72349  | 2384 | 80.74 (97.46) |
| During.FL.9  | 162647 | 153516 | 151892 | 129338 | 390 | 361 | 372.07 | 53.04 | 72802  | 1469 | 98.66 (96.87) |
| During.FL.10 | 159745 | 151727 | 149697 | 119807 | 397 | 361 | 372.24 | 50.88 | 74261  | 2236 | 83.89 (97.03) |
| During.FL.11 | 176216 | 167329 | 164013 | 141484 | 405 | 361 | 372.61 | 51.04 | 77746  | 2730 | 81.82 (97.58) |
| During.FL.12 | 167900 | 159791 | 157696 | 132179 | 408 | 361 | 372.22 | 50.97 | 80700  | 2451 | 83.16 (95.58) |
| After.A.1    | 145865 | 139175 | 138195 | 122417 | 397 | 359 | 372.35 | 50.64 | 78240  | 2082 | 84.13 (95.89) |
| After.A.2    | 168939 | 161308 | 160142 | 146536 | 386 | 363 | 372.42 | 50.28 | 93123  | 2173 | 84.76 (95.66) |
| After.A.3    | 161907 | 155191 | 153930 | 140398 | 404 | 363 | 372.53 | 49.81 | 81202  | 1952 | 83.11 (95.74) |
| After.A.4    | 168182 | 160254 | 159073 | 145209 | 406 | 362 | 372.39 | 50.72 | 97865  | 2182 | 86.48 (95.99) |
| After.A.5    | 171636 | 164491 | 162954 | 152202 | 387 | 363 | 371.96 | 50.55 | 105378 | 1711 | 85.18 (95.71) |

|             |        |        |        |        |     |     |        |       |        |      |               |
|-------------|--------|--------|--------|--------|-----|-----|--------|-------|--------|------|---------------|
| After.A.6   | 161036 | 153378 | 152209 | 137996 | 388 | 362 | 372.45 | 50.38 | 85020  | 2137 | 82.21 (96.02) |
| After.A.7   | 162239 | 154601 | 153425 | 138280 | 389 | 362 | 372.36 | 50.72 | 88910  | 2158 | 82.20 (96.84) |
| After.A.8   | 173429 | 165128 | 163238 | 151189 | 412 | 364 | 372.49 | 51.06 | 90880  | 1807 | 86.36 (96.09) |
| After.A.9   | 174458 | 166915 | 165702 | 148662 | 394 | 362 | 372.45 | 50.49 | 90220  | 2357 | 81.18 (98.64) |
| After.A.10  | 155924 | 148457 | 147194 | 136837 | 398 | 365 | 372.63 | 49.66 | 71413  | 1685 | 89.62 (98.39) |
| After.A.11  | 129938 | 122786 | 121612 | 112868 | 399 | 361 | 372.06 | 52.42 | 72146  | 1732 | 83.66 (97.76) |
| After.A.12  | 142437 | 135143 | 133546 | 123969 | 392 | 366 | 372.58 | 50.23 | 69403  | 1774 | 95.25 (98.72) |
| After.FL.1  | 176898 | 167462 | 164168 | 147686 | 402 | 359 | 372.58 | 52.66 | 89465  | 3395 | 93.21 (98.64) |
| After.FL.2  | 168993 | 160074 | 155446 | 144775 | 406 | 359 | 372.55 | 53.37 | 90401  | 2831 | 94.24 (98.09) |
| After.FL.3  | 169272 | 159606 | 156295 | 143730 | 397 | 360 | 372.77 | 53.2  | 97703  | 3851 | 82.97 (97.94) |
| After.FL.4  | 152181 | 143442 | 138540 | 131325 | 401 | 360 | 373.07 | 52.68 | 87756  | 2764 | 84.22 (98.03) |
| After.FL.5  | 130411 | 123195 | 120994 | 116116 | 404 | 359 | 372.97 | 52.91 | 92716  | 2331 | 97.86 (97.72) |
| After.FL.6  | 171451 | 162775 | 161080 | 143790 | 411 | 361 | 372.4  | 51.81 | 93500  | 3760 | 80.18 (96.69) |
| After.FL.7  | 155677 | 146794 | 141573 | 134805 | 401 | 359 | 373.35 | 52.13 | 94912  | 2461 | 88.43 (95.77) |
| After.FL.8  | 171355 | 162472 | 157779 | 145962 | 391 | 358 | 373.8  | 51.82 | 95237  | 2495 | 83.57 (98.38) |
| After.FL.9  | 161943 | 152883 | 150095 | 137961 | 406 | 358 | 372.8  | 52.61 | 89517  | 3903 | 82.40 (97.55) |
| After.FL.10 | 144380 | 136829 | 133315 | 127031 | 393 | 359 | 373.08 | 53.07 | 95507  | 2258 | 92.16 (98.53) |
| After.FL.11 | 150813 | 142649 | 140486 | 120098 | 407 | 359 | 372.55 | 51.13 | 63630  | 2763 | 87.59 (97.92) |
| After.FL.12 | 143375 | 136026 | 133813 | 121824 | 393 | 361 | 372.62 | 52.9  | 108863 | 1354 | 98.42 (97.08) |

**Table 3.** Spearman's correlation between microbial alpha-diversity indices and environmental factors.

|                               | Richness              | Chao 1                | Shannon             | Simpson             | Dominance           |
|-------------------------------|-----------------------|-----------------------|---------------------|---------------------|---------------------|
| ChI <i>a</i>                  | r=-0.517,<br>p=0.047* | r=-0.764,<br>p=0.027* | r=0.712,<br>p=0.054 | r=0.707,<br>p=0.059 | r=0.529,<br>p=0.066 |
| Temperature                   | r=0.711,<br>p=0.028*  | r=0.273,<br>p=0.048*  | r=0.665,<br>p=0.061 | r=0.628,<br>p=0.069 | r=0.417,<br>p=0.058 |
| Salinity                      | r=-0.763,<br>p=0.048* | R=-0.498,<br>p=0.041* | r=0.803,<br>p=0.069 | r=0.295,<br>p=0.054 | r=0.516,<br>p=0.052 |
| pH value                      | r=0.432,<br>p=0.057   | r=0.347,<br>p=0.067   | r=0.412,<br>p=0.056 | r=0.447,<br>p=0.067 | r=0.365,<br>p=0.051 |
| NO <sub>3</sub> <sup>-</sup>  | r=-0.238,<br>p=0.068  | r=0.567,<br>p=0.078   | r=0.198,<br>p=0.064 | r=0.453,<br>p=0.067 | r=0.657,<br>p=0.071 |
| NO <sub>2</sub> <sup>-</sup>  | r=0.451,<br>p=0.076   | r=0.199,<br>p=0.087   | r=0.659,<br>p=0.057 | r=0.452,<br>p=0.051 | r=0.366,<br>p=0.069 |
| NH <sub>4</sub> <sup>+</sup>  | r=0.117,<br>p=0.082   | r=0.332,<br>p=0.052   | r=0.557,<br>p=0.079 | r=0.409,<br>p=0.062 | r=0.523,<br>p=0.072 |
| PO <sub>4</sub> <sup>3-</sup> | r=0.166,<br>p=0.013*  | r=0.441,<br>p=0.037*  | r=0.663,<br>p=0.061 | r=0.472,<br>p=0.077 | r=0.631,<br>p=0.063 |
| IN/IP value                   | r=0.402,<br>p=0.025*  | r=0.339,<br>p=0.046*  | r=0.507,<br>p=0.091 | r=0.481,<br>p=0.083 | r=0.664,<br>p=0.075 |

**Table 4.** Significance test of the similarity between the phycosphere microbial communities and null model simulations at different stages, and  $\beta$ NTI and  $RC_{\text{Bray}}$  values based on Weighted Bray–Curtis distances.

| Bray-Curtis | Mean of observed similarity | Mean of null expected similarity | F     | P value | $\beta$ NTI value | $RC_{\text{Bray}}$ value |
|-------------|-----------------------------|----------------------------------|-------|---------|-------------------|--------------------------|
| Pre-AT      | 0.681                       | 0.624                            | 10.56 | 0.025   | -2.52             | -0.885                   |
| During-AT   | 0.524                       | 0.236                            | 9.67  | 0.012   | +3.22             | -0.263                   |
| Post-AT     | 0.329                       | 0.151                            | 12.85 | 0.019   | +0.57             | -0.969                   |
| Pre-FL      | 0.442                       | 0.209                            | 13.67 | 0.008   | +0.86             | -0.997                   |
| During-FL   | 0.546                       | 0.138                            | 29.33 | 0.027   | -4.25             | -0.558                   |
| Post-FL     | 0.621                       | 0.448                            | 27.11 | 0.036   | -3.11             | -0.281                   |

**Supplementary Figure 1.** Samples collected according to the HAB phases, including pre-, during- and post-bloom stages (the red cycle).

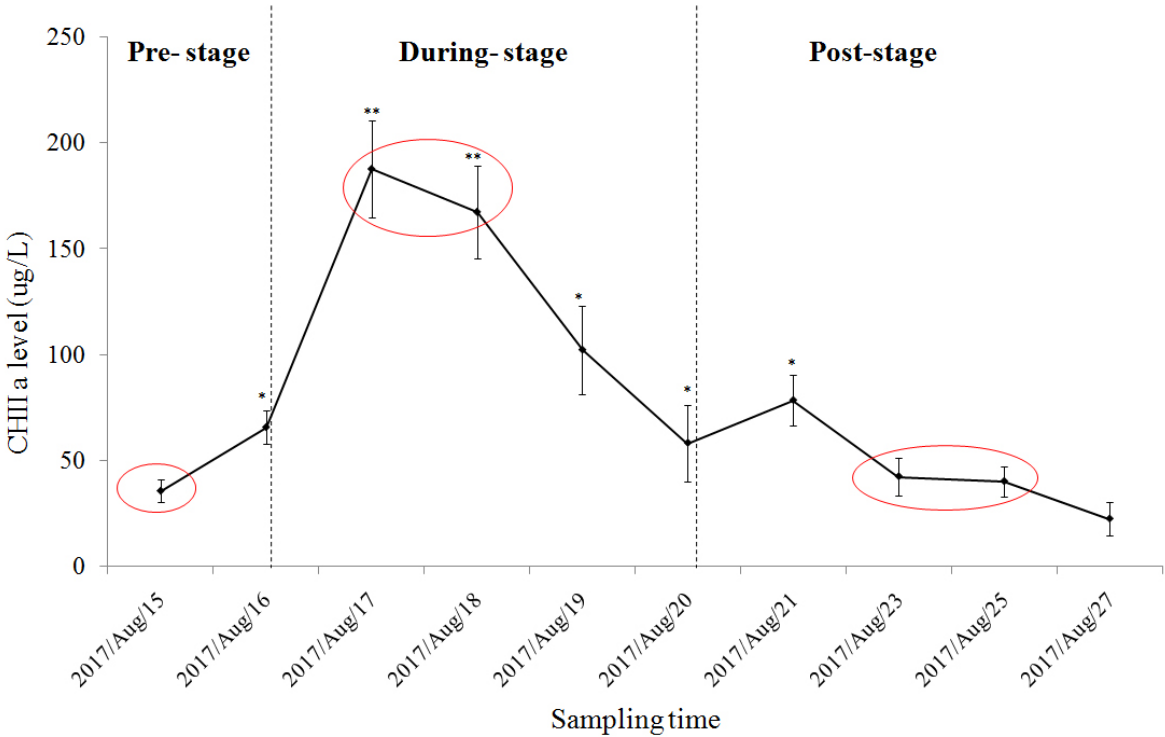



**Supplementary Figure 2.** Morphology of *S. trochoidea* under a light microscope. Scale bar is 20  $\mu\text{m}$ .

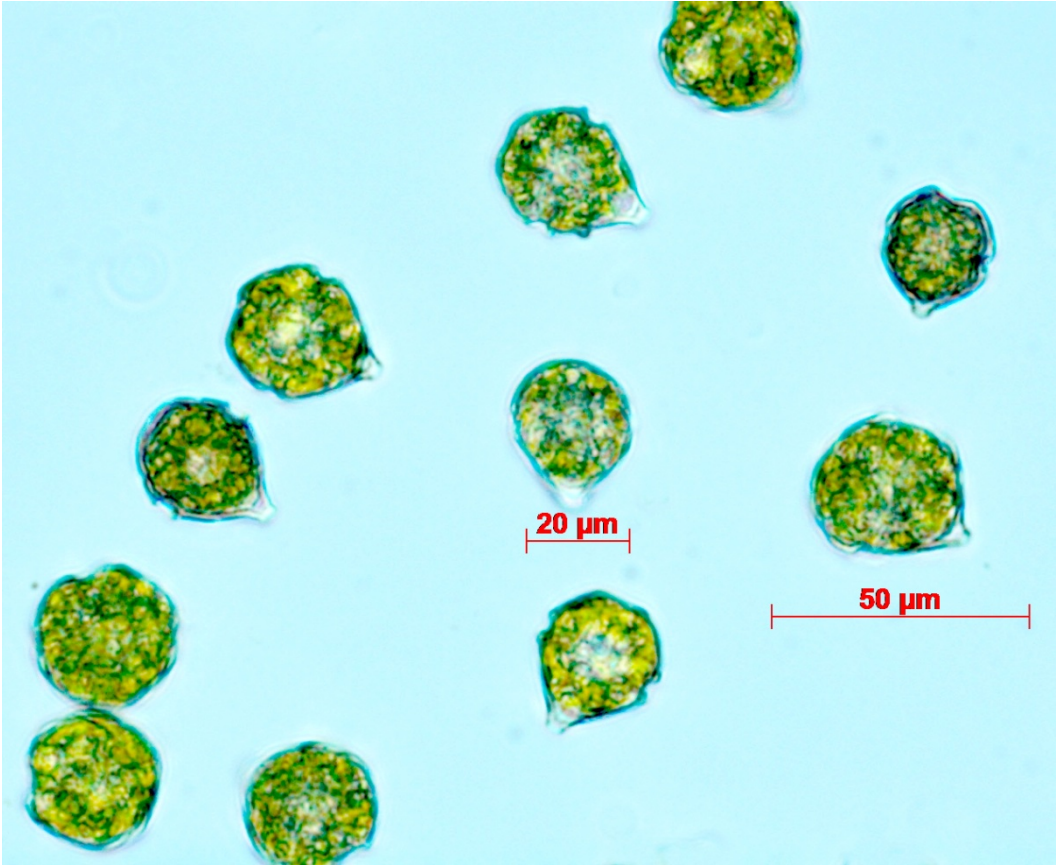

**Supplementary Figure 3.** Venn diagram showing the overlap of OTUs between sample types.

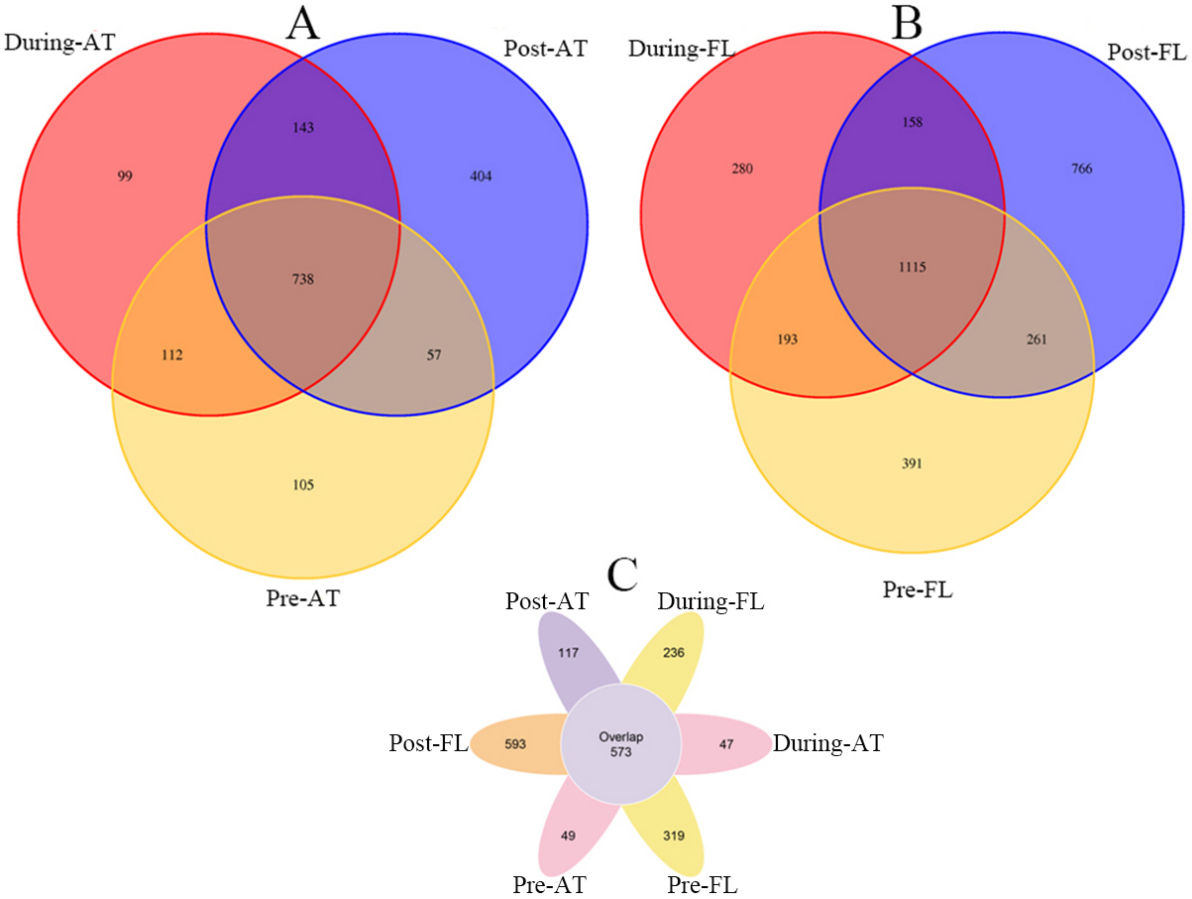



Supplementary Figure 5. Relative abundance of bacteria at phylum level.

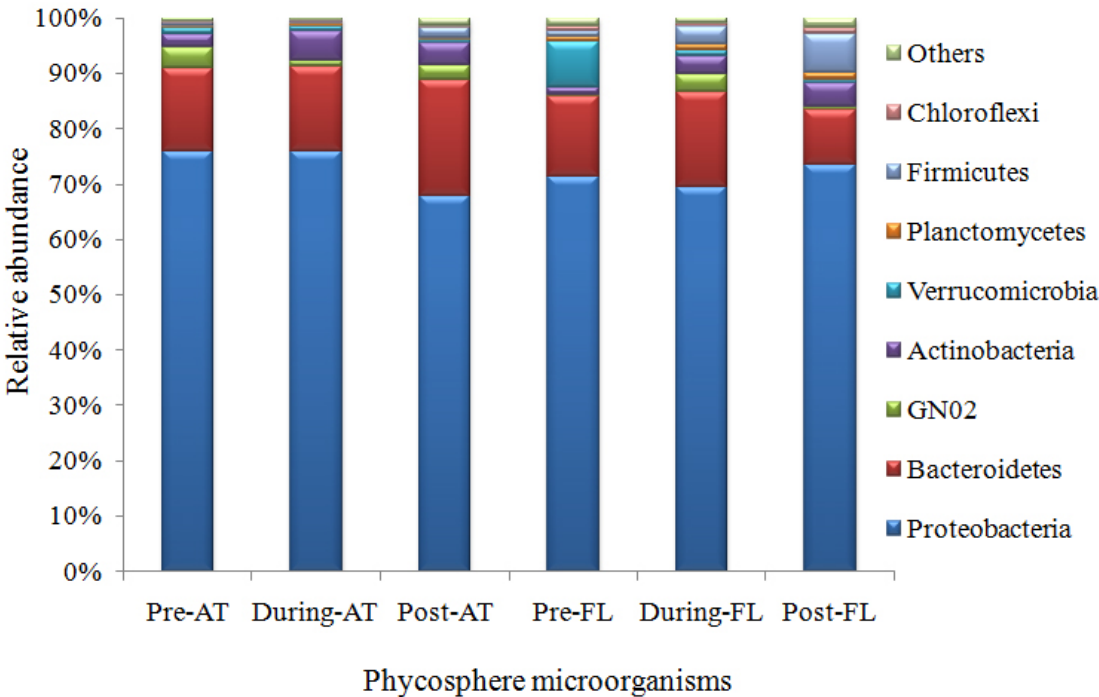

**Supplementary Figure 6.** Heat-map of microbial communities at family (A) and genus (B)

levels. AT, attached bacteria; FL, free-living bacteria.

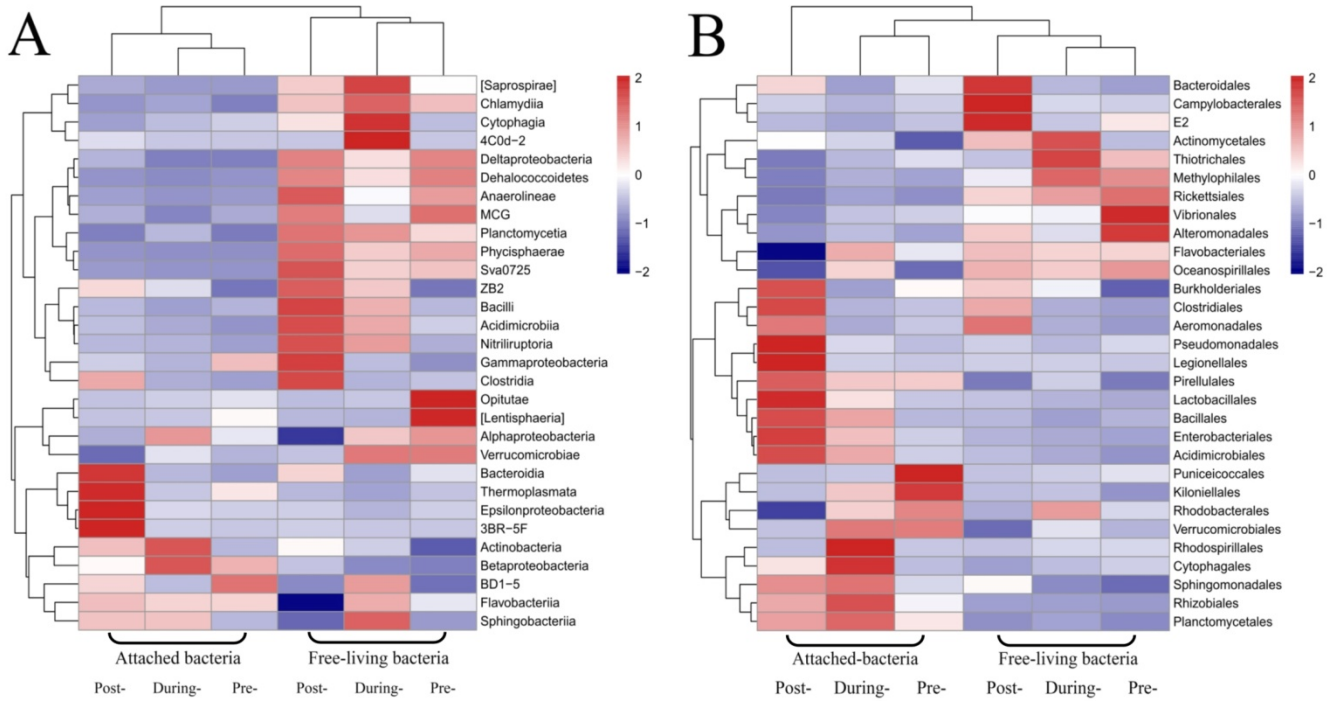

**Supplementary Figure 7.** (A) Bray-Curtis similarity-based dendrogram at the OTU level illustrating groups in samples. (B) Correspondence canonical analysis (CCA) based on microbial communities (OTUs) and environmental parameters sampled during the bloom.

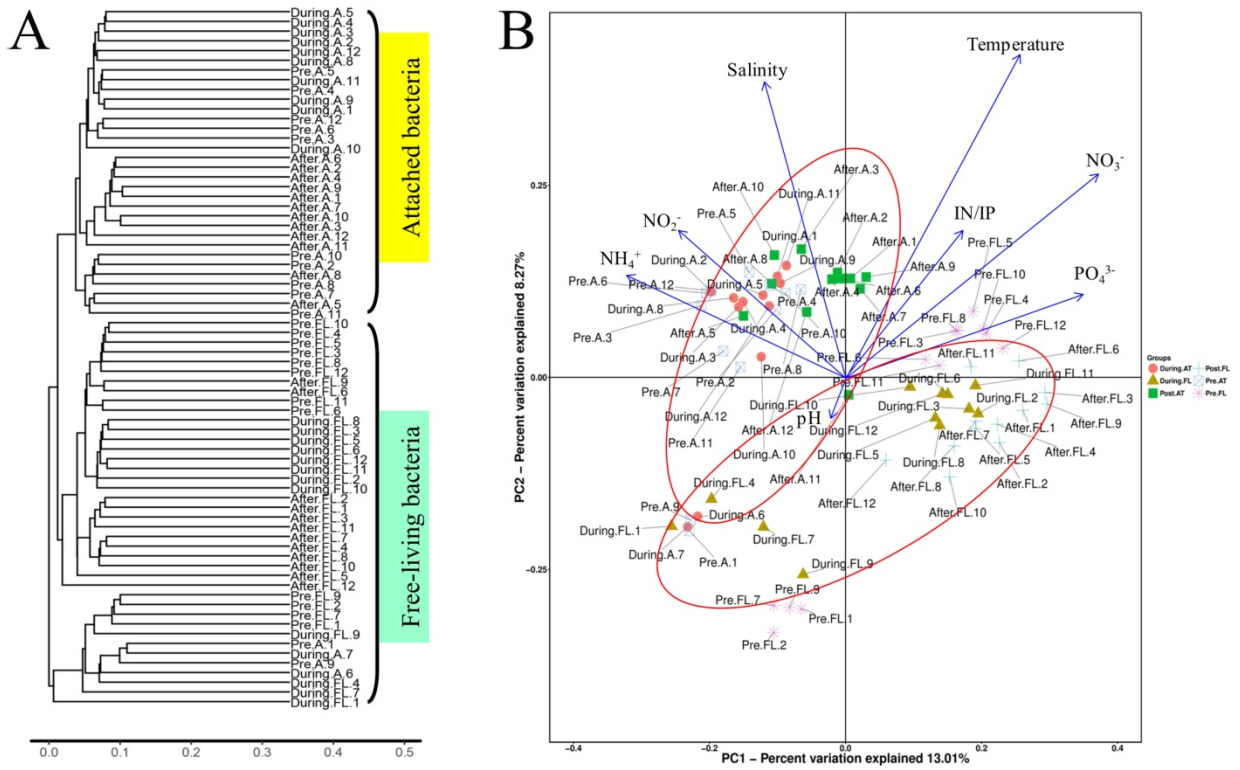

Supplement: AEM.00349-19-s0001.pdf [file AEM.00349-19-s0001.pdf]
